# Supplementary material for: Identification of Extensive Mycorrhizal Genera and Other Beneficial Microbes from Four Boxwood Cultivars with Varying Blight Resistance Levels
Source: Research Square preprint supplement (doi:10.21203/rs.3.rs-6315314/v1), 2025-05-05
Supplement: Supplementary file 1 [file 400b22d7125563578073be6e.docx]

**Supplementary materials and methods**

**Environmental condition of the nursery locations**

The Virginia nursery is located at the foothills of the Blue Ridge Mountains in Nelson County, central Virginia. It has a humid subtropical climate, characterized by hot and humid summers and mild winters with occasional snow. Summers are typically very hot and humid, with temperatures often exceeding 32°C. Winters bring cooler temperatures, with average highs around 7°C and lows between -2°C to 0°C. Precipitation is abundant throughout the year, with April being the wettest month on average. The area experiences all four seasons distinctly with mild spring and fall months.

The Oregon nursery is located in Clackamas County, in the northern part of the Willamette Valley in northwestern Oregon, near the city of Portland and Washington State. It is a mild, temperate climate with warm dry summers (average 7-29°C) and cool wet winters (1.7-10°C)[1]. Precipitation mainly occurs from fall through spring (1143 mm annually), with December being the wettest month on average. This area also experiences all four seasons with distinctly mild spring and fall months.

**Data cleaning**

16S sequences with no assignments at all seven taxonomic rankings (i.e., Kingdom, Phylum, Class, Order, Family, Genus, and Species) or assigned to chloroplast and mitochondria were removed. The remaining sequences were also re-classified to their best annotation if they, at any ranking, had the following ambiguous assignments: uncultured, soil_metagenome, low_GC, human_gut, agricultural_soil, metal-contaminated_soil, Unknonw_Family, uncultured_soil, uncultured_soil_bacterium, uncultured_bacterium, uncultured_sediment, uncultured_prokaryote, uncultured_rumen, unculture_organism, uncultured_forest, uncultured_deep-sea, uncultured_compost, uncultured_sludge, bacterium, bacterium_enrichment, metagenome, wastewater_metagenome, marine_metagenome, gut_metagenome, groundwater_metagenome, uncultured_sediment_bacterium, bacterium_enrichment_culture_clone_auto84_4w, permafrost_metagenome, uncultured_forest_bacterium, microbial_mat_metagenome, and unidentified; Similarly, ITS sequences with no taxonomic assignments at all seven taxonomic rankings were excluded for analysis. All samples were kept and further pruning retained the ASVs with over 10 sequences across all the samples.

**Supplementary Results**

**The difference of soil chemical property between cultivar blight resistance levels**

Seven soil chemical properties differed between cultivar blight resistance levels in Oregon, including Buffer pH, carbon (C), nitrogen (N), organic matter (OM), phosphorus (P), potassium (K), magnesium (Mg), zinc (Zn), and copper (Cu) (Figure S1). Specifically, soil N and OM levels were higher in both susceptible and tolerant cultivars compared to the intermediate ones. In contrast, P, K, Mg, Zn, and Cu levels were higher in the intermediate cultivars than the tolerant and/or susceptible ones. Additionally, soil C was higher in the susceptible than the intermediate cultivars, while buffer pH was lower in the tolerant than in the intermediate ones.

Five soil chemical properties differed between cultivar blight resistance levels in Virginia, including P, K, Na, Mg, and Zn. Specifically, all those five elements were higher in soils of the susceptible cultivar than in those of the intermediate and tolerant cultivars (Figure 1S).

Sequencing summary

A total of 8,427,380 and 10,432,809 raw sequences were generated for 16S rRNA and ITS amplicons, respectively. Further cleaning and pruning retained 7,925,673 16S rRNA and 6,442,166 ITS sequences, which reached a plateau (Figure S2), suggesting that the sequencing depth was sufficient for downstream analyses of both bacterial and fungal communities.

**Supplementary Tables**

Table S1. The best hyperparameters for model fitting and the accuracy and performance (ROC AUC) of the random forest classifiers

| Parameters | Bacteria, Oregon | Bacteria, Virginia | Fungi, Oregon | Fungi, Virginia |
| --- | --- | --- | --- | --- |
| Training and cross validation datasets | | | | |
| mtry | 2 | 2 | 2 | 2 |
| trees | 889 | 2000 | 1111 | 1111 |
| min_n | 2 | 2 | 10 | 2 |
| Accurary | 0.818 | 0.455 | 0.727 | 0.727 |
| ROC AUC | 0.781 | 0.848 | 0.926 | 0.978 |
| Full datasets | | | | |
| Out of bag error | 0.310 | 0.334 | 0.310 | 0.298 |

Table S2. Core bacterial genera with their phylum annotation specific to Oregon or Virginia and shared between the two locations

| **Shared** | **Oregon** | **Virginia** |
| --- | --- | --- |
| **Actinobacteriota** | **Actinobacteriota** | **Actinobacteriota** |
| o_*Gaiellales* | *Luedemannella* | f_*Micromonosporaceae* |
| 67-14 | *Blastococcus* | *Nocardioides* |
| *Gaiella* | **Verrucomicrobiota** | *Solirubrobacter* |
| f_Micrococcaceae | *Candidatus* *Udaeobacter* | **Myxococcota** |
| MB-A2-108 | **Chloroflexi** | *Haliangium* |
| IMCC26256 | TK10 | **Acidobacteriota** |
| *Conexibacter* |  | Subgroup_5 |
| *Acidothermus* |  |  |
| *Streptomyces* |  |  |
| *Mycobacterium* |  |  |
| **Proteobacteria** |  |  |
| f_*Xanthobacteraceae* |  |  |
| *Sphingomonas* |  |  |
| f_*Methyloligellaceae* |  |  |
| o_*Elsterales* |  |  |
| *Bradyrhizobium* |  |  |
| *Pedomicrobium* |  |  |
| **Acidobacteriota** |  |  |
| o_*Vicinamibacterales* |  |  |
| o_*Acidobacteriales* |  |  |
| f_*Vicinamibacteraceae* |  |  |
| *Candidatus* *Solibacter* |  |  |
| *Bryobacter* |  |  |
| **Gemmatimonadota** |  |  |
| f_*Gemmatimonadaceae* |  |  |
| *Gemmatimonas* |  |  |
| **Nitrospirota** |  |  |
| *Nitrospira* |  |  |
| **Methylomirabilota** |  |  |
| o_*Rokubacteriales* |  |  |
| **Chloroflexi** |  |  |
| KD4-96 |  |  |
| **Firmicutes** |  |  |
| *Bacillus* |  |  |

Table S3. Core fungal genera with their phylum annotation specific to Oregon or Virginia and shared between the two locations

| **Shared** | **Oregon** | **Virginia** |
| --- | --- | --- |
| Ascomycota | Ascomycota | Ascomycota |
| *Clonostachys* | *Pseudeurotium* | *Trichoderma* |
| *Fusarium* | *Paraphaeosphaeria* | *Humicola* |
| *Pseudonectria* |  |  |
| Basidiomycota |  |  |
| *Saitozyma* |  |  |
| *Solicoccozyma* |  |  |

**Supplementary Figures**


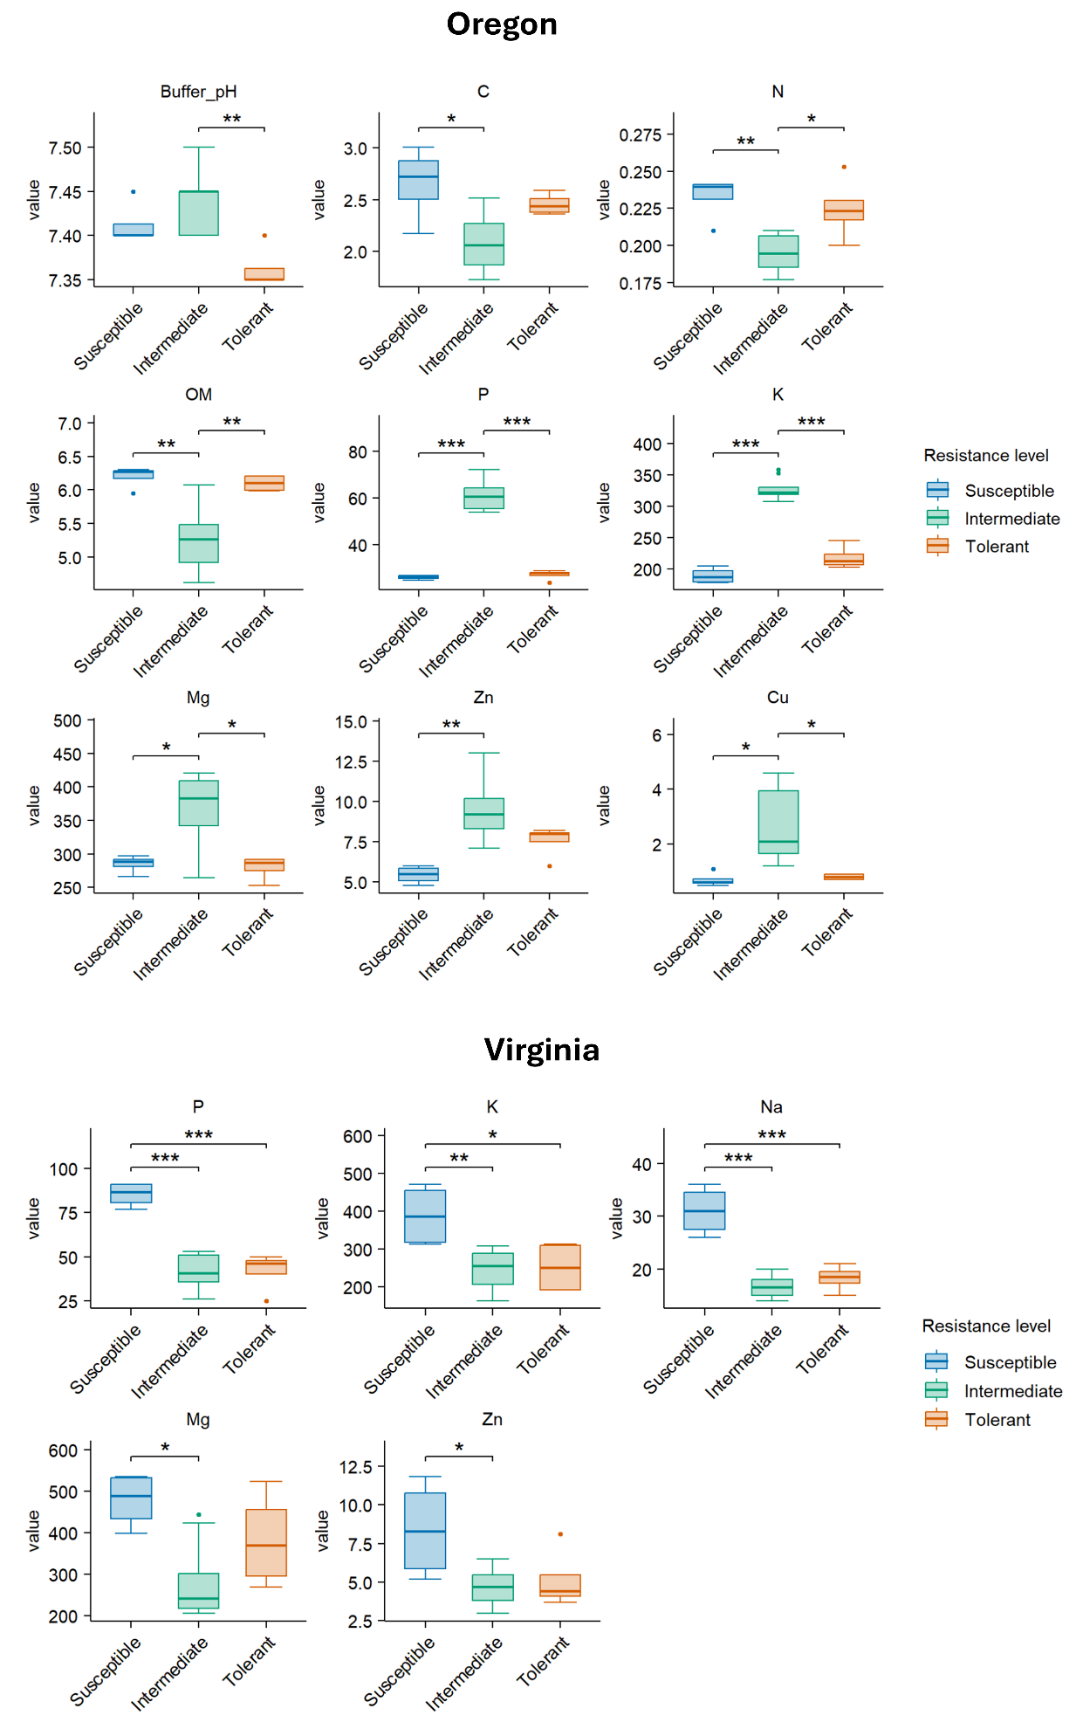


Figure S1. Boxplot showing the difference in soil chemical properties among cultivars with varying blight resistance levels in Oregon and Virginia.


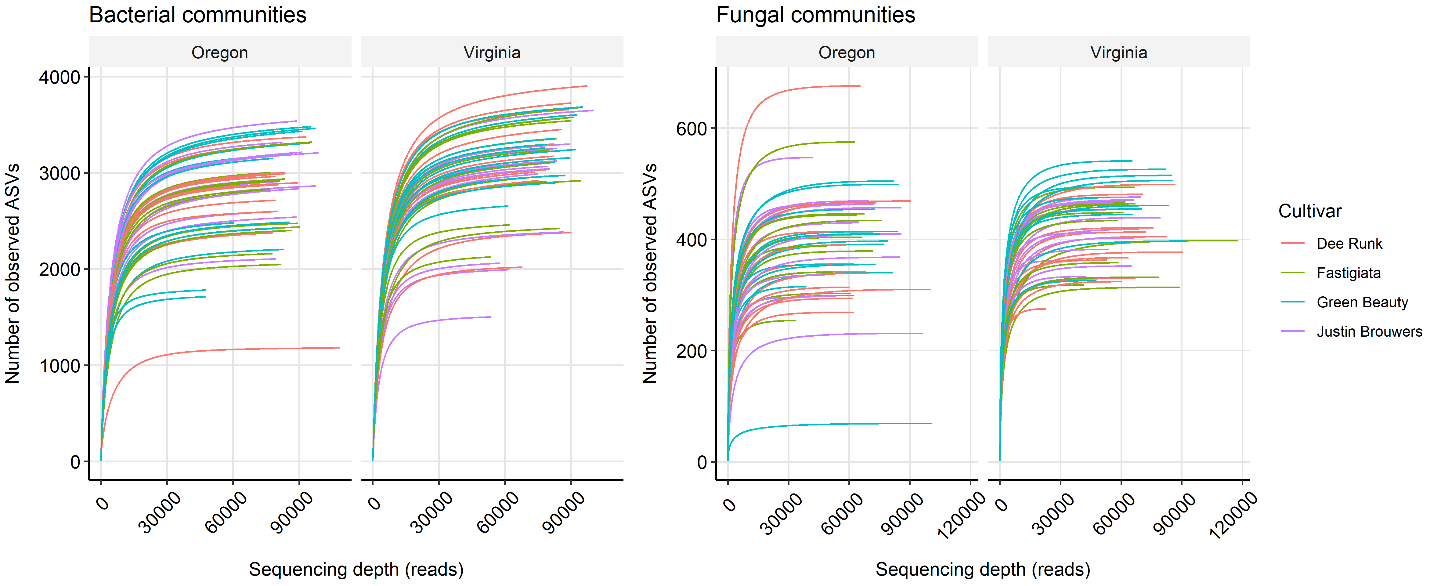


Figure S2. Rarefaction curve showing the sequencing depths for the bacterial (left) and fungal (right) communities among the four cultivars in Oregon and Virginia


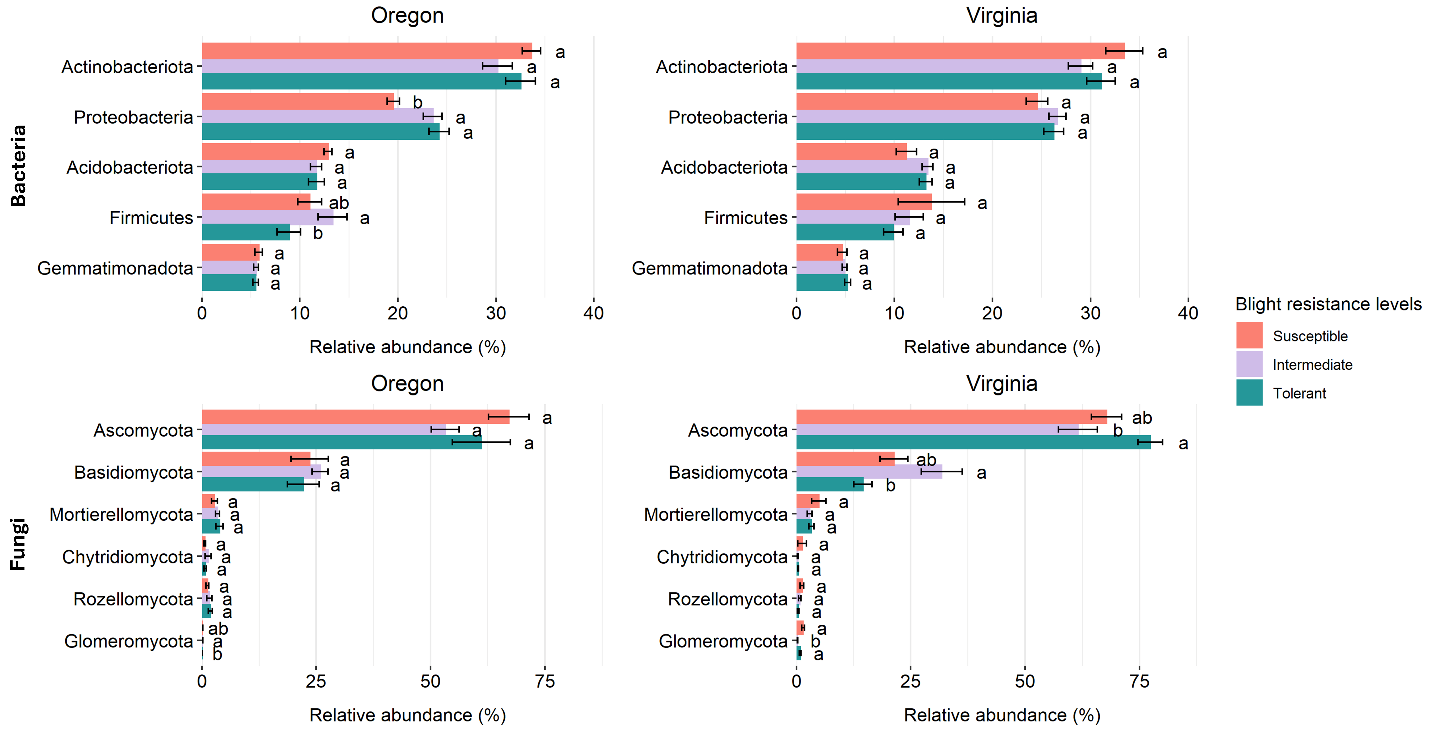


Figure S3. Barplot showing the most relatively abundant microbial phyla among the three cultivar blight resistance levels across Oregon and Virginia. Kruskal-Wallis and Dunn’s (post-hoc) tests were used to compare the relative abundance of a genus among three resistance levels. A group with significant mean difference is indicated by a different lowercase letter next to the bar.


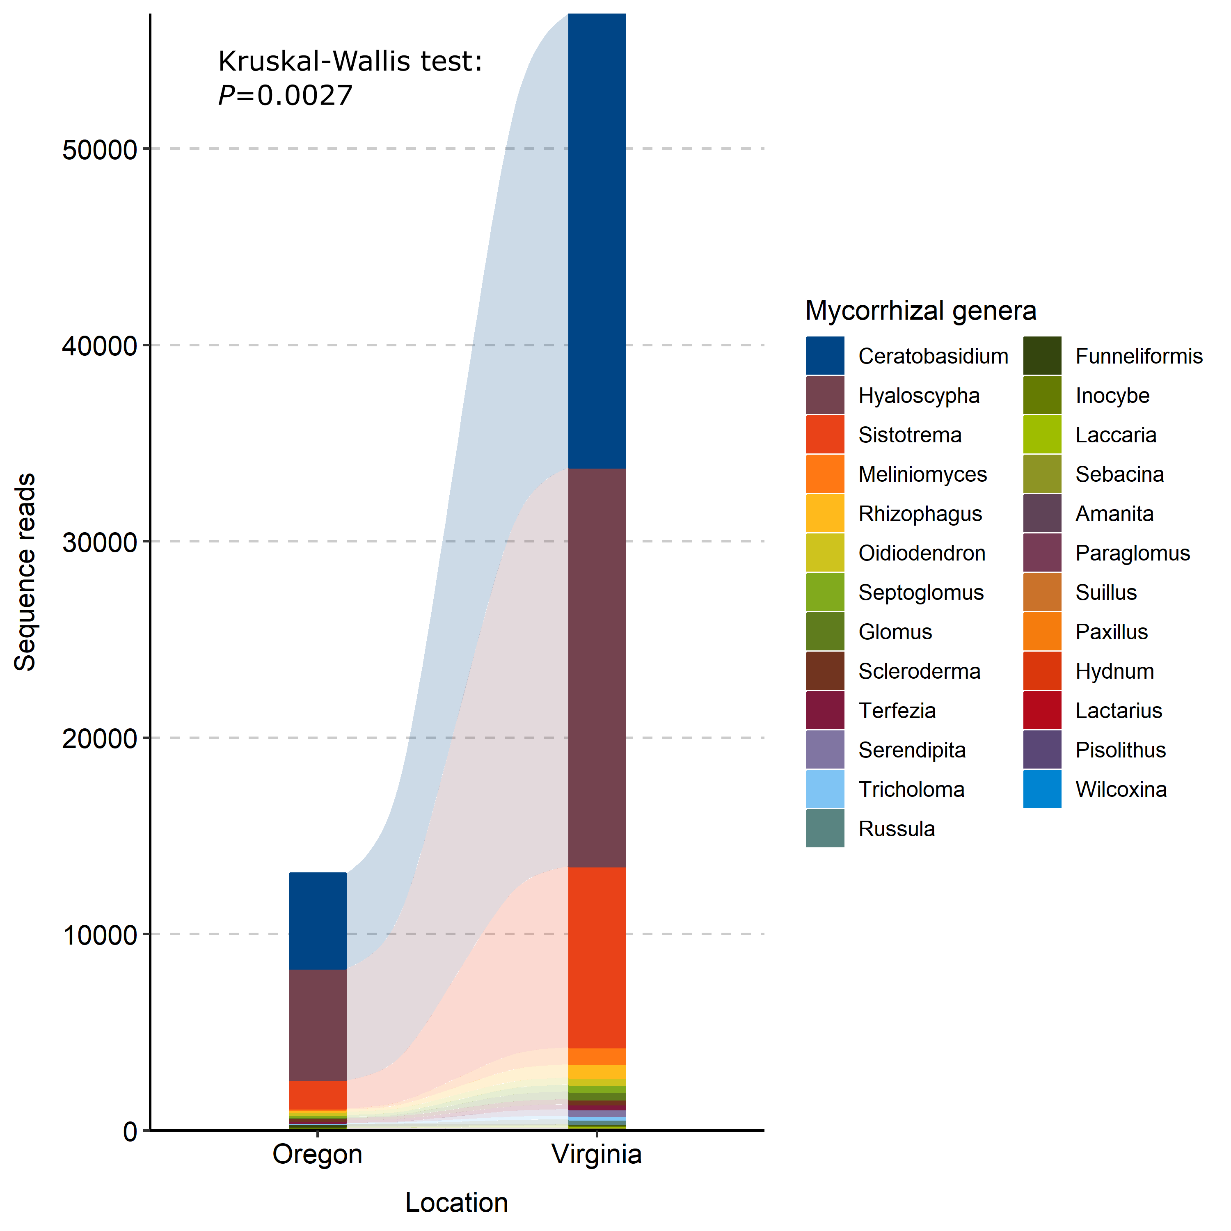


Figure S4. Bar plot showing the number of sequences and the composition of mycorrhizal fungal genera identified in Oregon and Virginia across all cultivars.


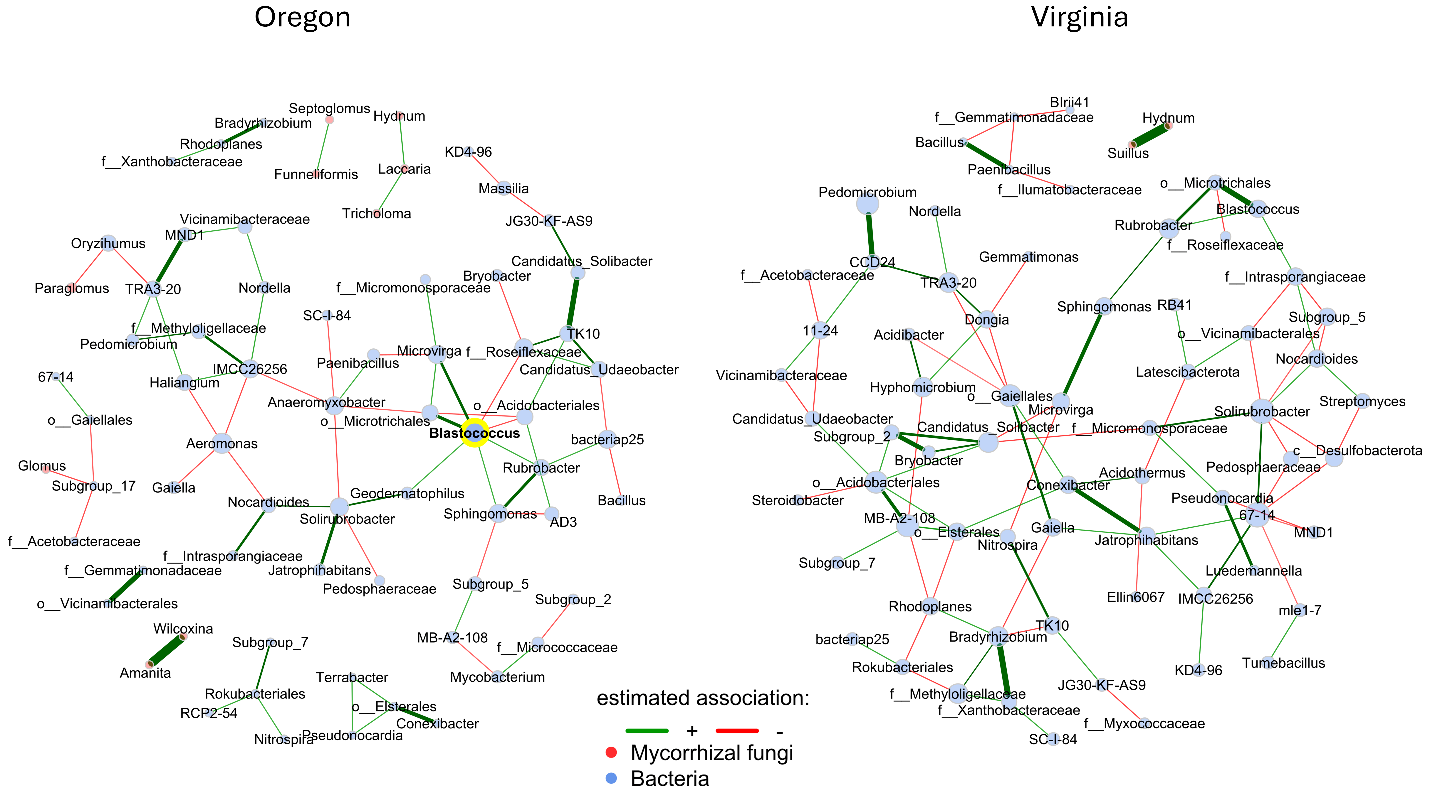


Figure S5. Mycorrhizal fungal and bacterial cross-kingdom networks constructed from intermediate cultivars. Salmon color nodes represent mycorrhizal fungal genera and light blue color nodes represent bacterial genera. Green color edges or links indicate positive associations and red color edges indicate negative associations. The size of an edge indicates the strength of the association. A hub taxon is indicated by yellow color circle and black bold face font.

**References**

1. Weiland JE, Ohkura M, Scagel CF, Davis EA, Beck BR. Cool Temperatures Favor Growth of Oregon Isolates of Calonectria pseudonaviculata and Increase Severity of Boxwood Blight on Two Buxus Cultivars. Plant Disease. 2022;106:3100–8.
